# Supplementary material
Source: publisher figshare collection journal article supplement (https://acs.figshare.com/ndownloader/files/5110816)
Supplement: Supplementary file 1 [file 5110816]

 
data_iv14_m 
 
_audit_creation_method            SHELXL-97 
_chemical_name_systematic 
; 
 ? 
; 
_chemical_name_common             ? 
_chemical_melting_point           ? 
_chemical_formula_moiety          ? 
_chemical_formula_sum 
 'C67 H91 Cl3 N6 Ni2 O10' 
_chemical_formula_weight          1364.23 
 
loop_ 
 _atom_type_symbol 
 _atom_type_description 
 _atom_type_scat_dispersion_real 
 _atom_type_scat_dispersion_imag 
 _atom_type_scat_source 
 'C'  'C'   0.0033   0.0016 
 'International Tables Vol C Tables 4.2.6.8 and 6.1.1.4' 
 'H'  'H'   0.0000   0.0000 
 'International Tables Vol C Tables 4.2.6.8 and 6.1.1.4' 
 'N'  'N'   0.0061   0.0033 
 'International Tables Vol C Tables 4.2.6.8 and 6.1.1.4' 
 'O'  'O'   0.0106   0.0060 
 'International Tables Vol C Tables 4.2.6.8 and 6.1.1.4' 
 'Cl'  'Cl'   0.1484   0.1585 
 'International Tables Vol C Tables 4.2.6.8 and 6.1.1.4' 
 'Ni'  'Ni'   0.3393   1.1124 
 'International Tables Vol C Tables 4.2.6.8 and 6.1.1.4' 
 
_symmetry_cell_setting            monoclinic 
_symmetry_space_group_name_H-M    P2(1)/n 
 
loop_ 
 _symmetry_equiv_pos_as_xyz 
 'x, y, z' 
 '-x+1/2, y+1/2, -z+1/2' 
 '-x, -y, -z' 
 'x-1/2, -y-1/2, z-1/2' 
 
_cell_length_a                    18.606(4) 
_cell_length_b                    15.396(3) 
_cell_length_c                    26.072(6) 
_cell_angle_alpha                 90.00 
_cell_angle_beta                  106.239(4) 
_cell_angle_gamma                 90.00 
_cell_volume                      7170(3) 
_cell_formula_units_Z             4 
_cell_measurement_temperature     117(1) 
_cell_measurement_reflns_used     ? 
_cell_measurement_theta_min       ? 
_cell_measurement_theta_max       ? 
 
_exptl_crystal_description        ? 
_exptl_crystal_colour             red 
_exptl_crystal_size_max           0.2 
_exptl_crystal_size_mid           0.15 
_exptl_crystal_size_min           0.06 
_exptl_crystal_density_meas       ? 
_exptl_crystal_density_diffrn     1.264 
_exptl_crystal_density_method     'not measured' 
_exptl_crystal_F_000              2888 
_exptl_absorpt_coefficient_mu     0.694 
_exptl_absorpt_correction_type    ? 
_exptl_absorpt_correction_T_min   ? 
_exptl_absorpt_correction_T_max   ? 
_exptl_absorpt_process_details    ? 
 
_exptl_special_details 
; 
 ? 
; 
 
_diffrn_ambient_temperature       117(1) 
_diffrn_radiation_wavelength      0.71073 
_diffrn_radiation_type            MoK\a 
_diffrn_radiation_source          'fine-focus sealed tube' 
_diffrn_radiation_monochromator   graphite 
_diffrn_measurement_device_type   ? 
_diffrn_measurement_method        ? 
_diffrn_detector_area_resol_mean  ? 
_diffrn_standards_number          ? 
_diffrn_standards_interval_count  ? 
_diffrn_standards_interval_time   ? 
_diffrn_standards_decay_%         ? 
_diffrn_reflns_number             23332 
_diffrn_reflns_av_R_equivalents   0.0496 
_diffrn_reflns_av_sigmaI/netI     0.0750 
_diffrn_reflns_limit_h_min        -20 
_diffrn_reflns_limit_h_max        20 
_diffrn_reflns_limit_k_min        -17 
_diffrn_reflns_limit_k_max        15 
_diffrn_reflns_limit_l_min        -28 
_diffrn_reflns_limit_l_max        19 
_diffrn_reflns_theta_min          1.55 
_diffrn_reflns_theta_max          23.59 
_reflns_number_total              9645 
_reflns_number_gt                 6428 
_reflns_threshold_expression      >2sigma(I) 
 
_computing_data_collection        ? 
_computing_cell_refinement        ? 
_computing_data_reduction         ? 
_computing_structure_solution     'SHELXS-97 (Sheldrick, 1990)' 
_computing_structure_refinement   'SHELXL-97 (Sheldrick, 1997)' 
_computing_molecular_graphics     ? 
_computing_publication_material   ? 
 
_refine_special_details 
; 
 Refinement of F^2^ against ALL reflections.  The weighted R-factor wR and 
 goodness of fit S are based on F^2^, conventional R-factors R are based 
 on F, with F set to zero for negative F^2^. The threshold expression of 
 F^2^ > 2sigma(F^2^) is used only for calculating R-factors(gt) etc. and is 
 not relevant to the choice of reflections for refinement.  R-factors based 
 on F^2^ are statistically about twice as large as those based on F, and R- 
 factors based on ALL data will be even larger. 
; 
 
_refine_ls_structure_factor_coef  Fsqd  
_refine_ls_matrix_type            full 
_refine_ls_weighting_scheme       calc  
_refine_ls_weighting_details 
 'calc w=1/[\s^2^(Fo^2^)+(0.1752P)^2^+1.2553P] where P=(Fo^2^+2Fc^2^)/3' 
_atom_sites_solution_primary      direct 
_atom_sites_solution_secondary    difmap 
_atom_sites_solution_hydrogens    geom 
_refine_ls_hydrogen_treatment     mixed 
_refine_ls_extinction_method      none 
_refine_ls_extinction_coef        ? 
_refine_ls_number_reflns          9645 
_refine_ls_number_parameters      811 
_refine_ls_number_restraints      0 
_refine_ls_R_factor_all           0.1259 
_refine_ls_R_factor_gt            0.0868 
_refine_ls_wR_factor_ref          0.2641 
_refine_ls_wR_factor_gt           0.2369 
_refine_ls_goodness_of_fit_ref    1.056 
_refine_ls_restrained_S_all       1.056 
_refine_ls_shift/su_max           6.688 
_refine_ls_shift/su_mean          0.049 
 
loop_ 
 _atom_site_label 
 _atom_site_type_symbol 
 _atom_site_fract_x 
 _atom_site_fract_y 
 _atom_site_fract_z 
 _atom_site_U_iso_or_equiv 
 _atom_site_adp_type 
 _atom_site_occupancy 
 _atom_site_symmetry_multiplicity 
 _atom_site_calc_flag 
 _atom_site_refinement_flags 
 _atom_site_disorder_assembly 
 _atom_site_disorder_group 
C1A C 0.1267(4) 0.2495(4) 0.2441(3) 0.0447(18) Uani 1 1 d . . . 
C2A C 0.0747(5) 0.2272(5) 0.1958(3) 0.057(2) Uani 1 1 d . . . 
H2A H 0.0238 0.2327 0.1925 0.069 Uiso 1 1 calc R . . 
C3A C 0.0972(5) 0.1978(5) 0.1535(3) 0.054(2) Uani 1 1 d . . . 
H3A H 0.0614 0.1828 0.1221 0.065 Uiso 1 1 calc R . . 
C4A C 0.1726(5) 0.1898(4) 0.1564(3) 0.0469(19) Uani 1 1 d . . . 
H4A H 0.1870 0.1691 0.1272 0.056 Uiso 1 1 calc R . . 
C5A C 0.2264(4) 0.2129(4) 0.2032(3) 0.0394(17) Uani 1 1 d . . . 
C6A C 0.2019(4) 0.2442(4) 0.2460(3) 0.0345(16) Uani 1 1 d . . . 
C7A C 0.2818(4) 0.3469(4) 0.3041(3) 0.0409(17) Uani 1 1 d . . . 
C8A C 0.3362(4) 0.3571(4) 0.3584(3) 0.0384(17) Uani 1 1 d . . . 
C9A C 0.3757(4) 0.4296(4) 0.3810(3) 0.0448(19) Uani 1 1 d . . . 
H9A H 0.3712 0.4813 0.3619 0.054 Uiso 1 1 calc R . . 
C10A C 0.4214(4) 0.4245(4) 0.4316(3) 0.0426(18) Uani 1 1 d . . . 
H10A H 0.4485 0.4731 0.4471 0.051 Uiso 1 1 calc R . . 
C11A C 0.4284(4) 0.3481(4) 0.4606(3) 0.0409(17) Uani 1 1 d . . . 
H11A H 0.4590 0.3449 0.4955 0.049 Uiso 1 1 calc R . . 
C12A C 0.3886(4) 0.2770(4) 0.4360(2) 0.0287(14) Uani 1 1 d . . . 
C13A C 0.3870(4) 0.1862(4) 0.4576(3) 0.0326(15) Uani 1 1 d . . . 
C14A C 0.3396(4) 0.0442(4) 0.4331(2) 0.0352(16) Uani 1 1 d . . . 
C15A C 0.2849(4) 0.0132(4) 0.4564(3) 0.0449(18) Uani 1 1 d . . . 
C16A C 0.2849(5) -0.0773(5) 0.4662(3) 0.059(2) Uani 1 1 d . . . 
H16A H 0.2494 -0.1006 0.4813 0.071 Uiso 1 1 calc R . . 
C17A C 0.3353(5) -0.1300(4) 0.4541(3) 0.054(2) Uani 1 1 d . . . 
H17A H 0.3347 -0.1890 0.4617 0.065 Uiso 1 1 calc R . . 
C18A C 0.3876(5) -0.0991(4) 0.4309(3) 0.054(2) Uani 1 1 d . . . 
H18A H 0.4215 -0.1374 0.4228 0.065 Uiso 1 1 calc R . . 
C19A C 0.3910(4) -0.0098(4) 0.4188(3) 0.0417(18) Uani 1 1 d . . . 
C20A C 0.0995(5) 0.2824(6) 0.2894(3) 0.061(2) Uani 1 1 d . . . 
H20A H 0.142(5) 0.275(5) 0.321(3) 0.073 Uiso 1 1 calc . . . 
C21A C 0.0364(6) 0.2327(7) 0.2996(5) 0.109(4) Uani 1 1 d . . . 
H21A H -0.0083 0.2429 0.2711 0.164 Uiso 1 1 calc R . . 
H21B H 0.0286 0.2514 0.3328 0.164 Uiso 1 1 calc R . . 
H21C H 0.0480 0.1719 0.3016 0.164 Uiso 1 1 calc R . . 
C22A C 0.0824(8) 0.3764(6) 0.2868(5) 0.115(4) Uani 1 1 d . . . 
H22A H 0.1128 0.4058 0.2679 0.173 Uiso 1 1 calc R . . 
H22B H 0.0928 0.3994 0.3224 0.173 Uiso 1 1 calc R . . 
H22C H 0.0305 0.3852 0.2684 0.173 Uiso 1 1 calc R . . 
C23A C 0.3084(4) 0.2058(4) 0.2064(3) 0.0461(19) Uani 1 1 d . . . 
H23A H 0.333(4) 0.253(5) 0.230(3) 0.055 Uiso 1 1 calc . . . 
C24A C 0.3436(6) 0.1226(6) 0.2329(4) 0.079(3) Uani 1 1 d . . . 
H24A H 0.3167 0.0737 0.2140 0.119 Uiso 1 1 calc R . . 
H24B H 0.3416 0.1216 0.2693 0.119 Uiso 1 1 calc R . . 
H24C H 0.3949 0.1199 0.2321 0.119 Uiso 1 1 calc R . . 
C25A C 0.3275(5) 0.2172(5) 0.1542(3) 0.062(2) Uani 1 1 d . . . 
H25A H 0.3034 0.1725 0.1297 0.093 Uiso 1 1 calc R . . 
H25B H 0.3807 0.2133 0.1603 0.093 Uiso 1 1 calc R . . 
H25C H 0.3104 0.2731 0.1393 0.093 Uiso 1 1 calc R . . 
C26A C 0.2294(6) 0.0723(6) 0.4710(4) 0.074(3) Uani 1 1 d . . . 
H26A H 0.250(5) 0.131(6) 0.473(3) 0.089 Uiso 1 1 calc . . . 
C27A C 0.1548(8) 0.0723(10) 0.4276(4) 0.138(6) Uani 1 1 d . . . 
H27A H 0.1622 0.0940 0.3949 0.207 Uiso 1 1 calc R . . 
H27B H 0.1198 0.1088 0.4384 0.207 Uiso 1 1 calc R . . 
H27C H 0.1356 0.0141 0.4221 0.207 Uiso 1 1 calc R . . 
C28A C 0.2156(6) 0.0519(7) 0.5245(4) 0.092(3) Uani 1 1 d . . . 
H28A H 0.1830 0.0026 0.5208 0.139 Uiso 1 1 calc R . . 
H28B H 0.1927 0.1011 0.5362 0.139 Uiso 1 1 calc R . . 
H28C H 0.2624 0.0392 0.5504 0.139 Uiso 1 1 calc R . . 
C29A C 0.4467(4) 0.0224(4) 0.3915(3) 0.0402(18) Uani 1 1 d . . . 
H29A H 0.429(4) 0.079(4) 0.376(3) 0.048 Uiso 1 1 calc . . . 
C30A C 0.5221(4) 0.0379(5) 0.4321(3) 0.054(2) Uani 1 1 d . . . 
H30A H 0.5155 0.0754 0.4599 0.081 Uiso 1 1 calc R . . 
H30B H 0.5556 0.0648 0.4148 0.081 Uiso 1 1 calc R . . 
H30C H 0.5427 -0.0165 0.4473 0.081 Uiso 1 1 calc R . . 
C31A C 0.4543(5) -0.0335(6) 0.3465(3) 0.068(2) Uani 1 1 d . . . 
H31A H 0.4729 -0.0896 0.3600 0.102 Uiso 1 1 calc R . . 
H31B H 0.4886 -0.0069 0.3298 0.102 Uiso 1 1 calc R . . 
H31C H 0.4063 -0.0399 0.3208 0.102 Uiso 1 1 calc R . . 
C1B C 0.4752(4) 0.6072(4) 0.6939(3) 0.0404(17) Uani 1 1 d . . . 
C2B C 0.5038(4) 0.6914(4) 0.6956(3) 0.0500(19) Uani 1 1 d . . . 
H2B H 0.5392 0.7109 0.7262 0.060 Uiso 1 1 calc R . . 
C3B C 0.4803(5) 0.7446(4) 0.6530(3) 0.053(2) Uani 1 1 d . . . 
H3B H 0.5005 0.8000 0.6545 0.064 Uiso 1 1 calc R . . 
C4B C 0.4262(5) 0.7182(4) 0.6067(4) 0.055(2) Uani 1 1 d . . . 
H4B H 0.4105 0.7564 0.5781 0.066 Uiso 1 1 calc R . . 
C5B C 0.3956(4) 0.6348(4) 0.6032(3) 0.0413(17) Uani 1 1 d . . . 
C6B C 0.4222(4) 0.5795(4) 0.6469(3) 0.0380(17) Uani 1 1 d . . . 
C7B C 0.4149(4) 0.4341(4) 0.6130(3) 0.0366(16) Uani 1 1 d . . . 
C8B C 0.3856(4) 0.3450(4) 0.6193(3) 0.0377(16) Uani 1 1 d . . . 
C9B C 0.3961(4) 0.2691(4) 0.5943(3) 0.0410(17) Uani 1 1 d . . . 
H9B H 0.4237 0.2682 0.5695 0.049 Uiso 1 1 calc R . . 
C10B C 0.3640(4) 0.1939(4) 0.6076(3) 0.054(2) Uani 1 1 d . . . 
H10B H 0.3707 0.1413 0.5920 0.065 Uiso 1 1 calc R . . 
C11B C 0.3235(5) 0.1965(5) 0.6426(4) 0.078(3) Uani 1 1 d . . . 
H11B H 0.3029 0.1456 0.6514 0.093 Uiso 1 1 calc R . . 
C12B C 0.3118(5) 0.2758(5) 0.6664(4) 0.076(3) Uani 1 1 d . . . 
C13B C 0.2699(7) 0.2939(5) 0.7050(5) 0.103(4) Uani 1 1 d . . . 
C14B C 0.2419(11) 0.4023(6) 0.7606(8) 0.125(6) Uani 1 1 d . . . 
C15B C 0.2842(10) 0.3936(8) 0.8156(8) 0.131(7) Uani 1 1 d . . . 
C16B C 0.2524(11) 0.4170(8) 0.8569(7) 0.177(10) Uani 1 1 d . . . 
H16B H 0.2775 0.4129 0.8931 0.212 Uiso 1 1 calc R . . 
C17B C 0.1725(15) 0.4496(8) 0.8356(10) 0.187(12) Uani 1 1 d . . . 
H17B H 0.1473 0.4652 0.8604 0.225 Uiso 1 1 calc R . . 
C18B C 0.1361(15) 0.4573(9) 0.7844(11) 0.211(15) Uani 1 1 d . . . 
H18B H 0.0888 0.4825 0.7743 0.253 Uiso 1 1 calc R . . 
C19B C 0.1680(15) 0.4283(9) 0.7467(9) 0.152(9) Uani 1 1 d . . . 
C20B C 0.5027(5) 0.5473(4) 0.7422(3) 0.0465(19) Uani 1 1 d . . . 
H20B H 0.462(4) 0.507(5) 0.742(3) 0.056 Uiso 1 1 calc . . . 
C21B C 0.5228(6) 0.5952(6) 0.7956(3) 0.077(3) Uani 1 1 d . . . 
H21D H 0.5351 0.5538 0.8243 0.115 Uiso 1 1 calc R . . 
H21E H 0.4808 0.6295 0.7982 0.115 Uiso 1 1 calc R . . 
H21F H 0.5650 0.6324 0.7980 0.115 Uiso 1 1 calc R . . 
C22B C 0.5685(5) 0.4939(5) 0.7373(3) 0.068(2) Uani 1 1 d . . . 
H22D H 0.5565 0.4669 0.7028 0.102 Uiso 1 1 calc R . . 
H22E H 0.5796 0.4499 0.7645 0.102 Uiso 1 1 calc R . . 
H22F H 0.6113 0.5309 0.7416 0.102 Uiso 1 1 calc R . . 
C23B C 0.3353(5) 0.6104(5) 0.5542(3) 0.055(2) Uani 1 1 d . . . 
H23B H 0.318(4) 0.552(5) 0.559(3) 0.066 Uiso 1 1 calc . . . 
C24B C 0.2670(6) 0.6720(6) 0.5452(4) 0.085(3) Uani 1 1 d . . . 
H24D H 0.2826 0.7306 0.5416 0.128 Uiso 1 1 calc R . . 
H24E H 0.2467 0.6683 0.5752 0.128 Uiso 1 1 calc R . . 
H24F H 0.2295 0.6553 0.5133 0.128 Uiso 1 1 calc R . . 
C25B C 0.3623(5) 0.6100(5) 0.5042(3) 0.071(3) Uani 1 1 d . . . 
H25D H 0.3807 0.6666 0.4990 0.107 Uiso 1 1 calc R . . 
H25E H 0.3215 0.5949 0.4738 0.107 Uiso 1 1 calc R . . 
H25F H 0.4018 0.5681 0.5083 0.107 Uiso 1 1 calc R . . 
C26B C 0.3642(10) 0.3602(14) 0.8332(7) 0.171(9) Uani 1 1 d . . . 
H26B H 0.378(9) 0.344(10) 0.801(7) 0.205 Uiso 1 1 calc . . . 
C27B C 0.3705(12) 0.2785(13) 0.8668(11) 0.259(14) Uani 1 1 d . . . 
H27D H 0.4172 0.2790 0.8944 0.389 Uiso 1 1 calc R . . 
H27E H 0.3686 0.2284 0.8445 0.389 Uiso 1 1 calc R . . 
H27F H 0.3298 0.2764 0.8826 0.389 Uiso 1 1 calc R . . 
C28B C 0.4196(12) 0.4288(14) 0.8617(7) 0.248(13) Uani 1 1 d . . . 
H28D H 0.4037 0.4848 0.8465 0.371 Uiso 1 1 calc R . . 
H28E H 0.4682 0.4159 0.8577 0.371 Uiso 1 1 calc R . . 
H28F H 0.4220 0.4292 0.8990 0.371 Uiso 1 1 calc R . . 
C29B C 0.133(2) 0.4426(15) 0.6998(18) 0.27(2) Uani 1 1 d . . . 
H29B H 0.165(15) 0.418(14) 0.679(10) 0.327 Uiso 1 1 calc . . . 
C30B C 0.1056(11) 0.5377(13) 0.6727(15) 0.36(2) Uani 1 1 d . . . 
H30D H 0.1378 0.5823 0.6924 0.537 Uiso 1 1 calc R . . 
H30E H 0.0551 0.5484 0.6735 0.537 Uiso 1 1 calc R . . 
H30F H 0.1078 0.5379 0.6363 0.537 Uiso 1 1 calc R . . 
C31B C 0.0455(14) 0.3896(13) 0.6759(8) 0.233(10) Uani 1 1 d . . . 
H31D H 0.0490 0.3319 0.6904 0.349 Uiso 1 1 calc R . . 
H31E H 0.0322 0.3865 0.6376 0.349 Uiso 1 1 calc R . . 
H31F H 0.0080 0.4216 0.6867 0.349 Uiso 1 1 calc R . . 
C32 C 0.000(3) 0.1505(18) 0.563(2) 0.56(5) Uani 1 1 d . . . 
H32 H 0.02(3) 0.12(4) 0.60(2) 0.674 Uiso 1 1 calc . . . 
C33 C 0.1944(13) 0.4053(15) 0.5345(10) 0.214(8) Uiso 1 1 d U . . 
C34 C 0.2383(17) 0.368(2) 0.4881(13) 0.260(12) Uiso 1 1 d U . . 
C35 C 0.1920(18) 0.335(2) 0.4525(13) 0.276(13) Uiso 1 1 d U . . 
C36 C 0.176(2) 0.458(2) 0.4246(16) 0.359(19) Uiso 1 1 d U . . 
Cl1 Cl 0.0000(5) 0.0802(6) 0.5174(4) 0.305(4) Uani 1 1 d . . . 
Cl2 Cl -0.0775(5) 0.2008(8) 0.5589(4) 0.370(6) Uani 1 1 d . . . 
Cl3 Cl 0.0643(11) 0.2295(9) 0.5539(12) 0.682(18) Uani 1 1 d . . . 
N1A N 0.2567(3) 0.2652(3) 0.2962(2) 0.0378(14) Uani 1 1 d . . . 
N2A N 0.3437(3) 0.2831(3) 0.3865(2) 0.0335(13) Uani 1 1 d . . . 
N3A N 0.3406(3) 0.1350(3) 0.4208(2) 0.0320(13) Uani 1 1 d . . . 
N1B N 0.3931(3) 0.4920(3) 0.6449(2) 0.0380(13) Uani 1 1 d . . . 
N2B N 0.3460(4) 0.3459(3) 0.6549(3) 0.0552(18) Uani 1 1 d . . . 
N3B N 0.2772(5) 0.3759(4) 0.7208(4) 0.097(3) Uani 1 1 d . . . 
Ni1A Ni 0.29187(5) 0.18854(5) 0.35485(3) 0.0334(3) Uani 1 1 d . . . 
Ni1B Ni 0.33249(6) 0.44726(5) 0.68583(4) 0.0559(4) Uani 1 1 d . . . 
O4 O 0.2397(3) 0.9296(3) 0.3285(2) 0.0603(15) Uani 1 1 d . . . 
O5 O 0.1639(7) 0.0905(7) 0.6752(5) 0.184(5) Uani 1 1 d . . . 
O6 O 0.3176(4) 0.7120(3) 0.6927(3) 0.097(2) Uani 1 1 d . . . 
O7 O 0.127(3) 0.449(3) 0.483(2) 0.68(3) Uiso 1 1 d U . . 
O1A O 0.2657(3) 0.4091(3) 0.27240(19) 0.0564(14) Uani 1 1 d . . . 
O2A O 0.4252(3) 0.1666(3) 0.50323(18) 0.0400(11) Uani 1 1 d . . . 
O3A O 0.2334(3) 0.0939(3) 0.32095(18) 0.0477(13) Uani 1 1 d . . . 
O1B O 0.2377(5) 0.2333(4) 0.7226(4) 0.135(4) Uani 1 1 d . . . 
O2B O 0.4565(3) 0.4461(3) 0.58382(18) 0.0400(11) Uani 1 1 d . . . 
O3B O 0.3157(3) 0.5513(3) 0.7182(2) 0.0612(16) Uani 1 1 d . . . 
 
loop_ 
 _atom_site_aniso_label 
 _atom_site_aniso_U_11 
 _atom_site_aniso_U_22 
 _atom_site_aniso_U_33 
 _atom_site_aniso_U_23 
 _atom_site_aniso_U_13 
 _atom_site_aniso_U_12 
C1A 0.060(5) 0.031(4) 0.042(5) 0.011(3) 0.011(4) -0.001(3) 
C2A 0.058(5) 0.055(5) 0.059(6) 0.016(4) 0.015(5) -0.001(4) 
C3A 0.066(6) 0.045(4) 0.041(5) 0.007(4) 0.000(4) -0.010(4) 
C4A 0.068(6) 0.031(4) 0.041(4) 0.004(3) 0.012(4) -0.002(4) 
C5A 0.046(5) 0.026(3) 0.041(4) 0.006(3) 0.004(4) -0.005(3) 
C6A 0.047(5) 0.021(3) 0.034(4) 0.009(3) 0.010(3) -0.002(3) 
C7A 0.058(5) 0.022(3) 0.048(5) 0.002(3) 0.023(4) -0.002(3) 
C8A 0.057(5) 0.020(3) 0.045(4) 0.000(3) 0.025(4) -0.003(3) 
C9A 0.078(5) 0.022(3) 0.041(5) -0.002(3) 0.028(4) -0.011(3) 
C10A 0.067(5) 0.022(3) 0.046(5) -0.011(3) 0.028(4) -0.017(3) 
C11A 0.059(5) 0.039(4) 0.033(4) -0.015(3) 0.027(4) -0.021(3) 
C12A 0.034(4) 0.028(3) 0.025(4) -0.006(3) 0.012(3) 0.000(3) 
C13A 0.047(4) 0.024(3) 0.035(4) -0.009(3) 0.023(4) -0.002(3) 
C14A 0.059(5) 0.021(3) 0.023(3) 0.000(3) 0.007(3) -0.007(3) 
C15A 0.065(5) 0.034(4) 0.039(4) 0.008(3) 0.020(4) -0.012(4) 
C16A 0.079(6) 0.050(5) 0.048(5) 0.011(4) 0.019(5) -0.026(5) 
C17A 0.078(6) 0.022(4) 0.056(5) 0.011(3) 0.010(5) -0.009(4) 
C18A 0.078(6) 0.025(4) 0.049(5) -0.003(3) 0.000(4) 0.001(4) 
C19A 0.061(5) 0.025(3) 0.035(4) 0.001(3) 0.006(4) -0.001(3) 
C20A 0.069(6) 0.071(6) 0.051(5) 0.016(4) 0.029(5) 0.007(5) 
C21A 0.124(10) 0.103(8) 0.136(10) -0.021(7) 0.094(8) -0.028(7) 
C22A 0.195(13) 0.071(7) 0.116(9) 0.010(6) 0.102(9) 0.017(8) 
C23A 0.061(5) 0.035(4) 0.036(4) -0.005(3) 0.005(4) 0.002(3) 
C24A 0.101(7) 0.065(6) 0.077(6) 0.023(5) 0.035(6) 0.027(5) 
C25A 0.074(6) 0.043(4) 0.072(6) 0.005(4) 0.027(5) 0.007(4) 
C26A 0.089(7) 0.061(6) 0.091(7) 0.009(5) 0.057(6) -0.016(5) 
C27A 0.135(11) 0.224(16) 0.066(7) 0.029(9) 0.049(8) 0.089(11) 
C28A 0.098(8) 0.123(9) 0.069(6) -0.029(6) 0.043(6) -0.043(7) 
C29A 0.057(5) 0.028(3) 0.038(4) 0.009(3) 0.017(4) 0.013(3) 
C30A 0.065(6) 0.042(4) 0.057(5) 0.004(4) 0.021(4) 0.005(4) 
C31A 0.077(6) 0.072(6) 0.056(5) -0.013(4) 0.019(5) -0.001(5) 
C1B 0.049(4) 0.031(4) 0.051(5) -0.005(3) 0.030(4) -0.003(3) 
C2B 0.056(5) 0.030(4) 0.068(5) -0.003(4) 0.024(4) -0.005(3) 
C3B 0.072(6) 0.026(4) 0.075(6) -0.004(4) 0.040(5) -0.006(4) 
C4B 0.073(6) 0.026(4) 0.087(6) 0.011(4) 0.056(5) 0.014(4) 
C5B 0.048(4) 0.037(4) 0.048(4) 0.000(3) 0.028(4) 0.008(3) 
C6B 0.046(4) 0.026(3) 0.053(5) -0.005(3) 0.032(4) -0.001(3) 
C7B 0.041(4) 0.028(3) 0.043(4) 0.001(3) 0.017(4) 0.000(3) 
C8B 0.046(4) 0.036(4) 0.038(4) -0.009(3) 0.024(4) -0.008(3) 
C9B 0.056(5) 0.031(4) 0.041(4) -0.009(3) 0.023(4) -0.003(3) 
C10B 0.075(6) 0.034(4) 0.065(5) -0.015(4) 0.041(5) -0.010(4) 
C11B 0.111(8) 0.036(4) 0.118(8) -0.030(5) 0.084(7) -0.028(4) 
C12B 0.117(8) 0.036(4) 0.110(7) -0.030(5) 0.089(7) -0.030(5) 
C13B 0.171(11) 0.039(5) 0.156(10) -0.031(6) 0.139(9) -0.042(6) 
C14B 0.188(15) 0.046(6) 0.217(17) -0.054(8) 0.183(15) -0.051(7) 
C15B 0.175(15) 0.092(9) 0.194(15) -0.095(10) 0.165(13) -0.096(9) 
C16B 0.28(2) 0.106(10) 0.250(19) -0.112(12) 0.246(19) -0.118(12) 
C17B 0.31(3) 0.046(7) 0.33(3) -0.063(12) 0.31(3) -0.073(11) 
C18B 0.33(3) 0.077(9) 0.36(3) 0.034(15) 0.33(3) 0.028(12) 
C19B 0.24(2) 0.049(7) 0.26(2) 0.007(10) 0.22(2) -0.009(10) 
C20B 0.064(5) 0.031(4) 0.051(5) -0.008(3) 0.029(4) -0.012(4) 
C21B 0.113(8) 0.069(6) 0.051(5) -0.006(5) 0.029(5) -0.009(5) 
C22B 0.091(7) 0.054(5) 0.065(6) 0.017(4) 0.035(5) 0.011(5) 
C23B 0.060(5) 0.053(5) 0.054(5) 0.004(4) 0.020(4) 0.012(4) 
C24B 0.086(7) 0.080(6) 0.091(7) 0.004(6) 0.029(6) 0.015(5) 
C25B 0.099(7) 0.050(5) 0.061(6) 0.003(4) 0.016(5) 0.009(5) 
C26B 0.169(15) 0.24(2) 0.160(14) -0.138(14) 0.133(13) -0.144(15) 
C27B 0.24(2) 0.21(2) 0.42(4) -0.12(2) 0.25(3) -0.119(19) 
C28B 0.29(3) 0.32(3) 0.167(16) -0.117(17) 0.118(17) -0.22(2) 
C29B 0.35(4) 0.136(17) 0.49(5) 0.12(2) 0.38(4) 0.10(2) 
C30B 0.153(17) 0.168(18) 0.79(7) 0.19(3) 0.19(3) 0.066(15) 
C31B 0.33(3) 0.180(19) 0.24(2) -0.013(18) 0.17(2) -0.01(2) 
C32 1.08(11) 0.19(2) 0.80(8) 0.26(4) 0.91(9) 0.32(4) 
Cl1 0.306(9) 0.333(10) 0.287(9) 0.007(8) 0.099(8) 0.073(8) 
Cl2 0.261(9) 0.540(16) 0.322(11) -0.063(11) 0.102(8) 0.090(10) 
Cl3 0.66(3) 0.303(13) 1.29(6) -0.24(2) 0.61(3) -0.061(16) 
N1A 0.056(4) 0.024(3) 0.036(3) 0.001(2) 0.017(3) -0.005(3) 
N2A 0.048(4) 0.017(3) 0.045(4) -0.004(2) 0.029(3) -0.001(2) 
N3A 0.044(3) 0.021(3) 0.030(3) -0.002(2) 0.010(3) -0.006(2) 
N1B 0.047(3) 0.031(3) 0.043(3) -0.010(2) 0.024(3) -0.003(3) 
N2B 0.078(5) 0.023(3) 0.083(5) -0.012(3) 0.054(4) -0.013(3) 
N3B 0.151(8) 0.042(4) 0.151(8) -0.038(4) 0.131(7) -0.037(4) 
Ni1A 0.0524(6) 0.0179(4) 0.0312(5) -0.0005(3) 0.0137(4) -0.0050(4) 
Ni1B 0.0775(8) 0.0279(5) 0.0860(8) -0.0175(5) 0.0621(7) -0.0151(4) 
O4 0.091(4) 0.027(2) 0.054(3) -0.001(2) 0.005(3) -0.009(2) 
O5 0.258(13) 0.129(8) 0.200(11) 0.018(8) 0.122(11) 0.010(8) 
O6 0.152(6) 0.034(3) 0.155(6) 0.012(3) 0.124(6) 0.024(3) 
O1A 0.087(4) 0.026(2) 0.053(3) 0.011(2) 0.013(3) -0.005(2) 
O2A 0.055(3) 0.030(2) 0.034(3) -0.005(2) 0.010(2) 0.000(2) 
O3A 0.067(3) 0.028(2) 0.040(3) 0.002(2) 0.002(2) -0.015(2) 
O1B 0.218(9) 0.053(4) 0.214(9) -0.058(5) 0.193(8) -0.066(5) 
O2B 0.049(3) 0.033(2) 0.044(3) -0.005(2) 0.024(3) -0.003(2) 
O3B 0.080(4) 0.036(3) 0.093(4) -0.015(3) 0.066(3) -0.007(3) 
 
_geom_special_details 
; 
 All esds (except the esd in the dihedral angle between two l.s. planes) 
 are estimated using the full covariance matrix.  The cell esds are taken 
 into account individually in the estimation of esds in distances, angles 
 and torsion angles; correlations between esds in cell parameters are only 
 used when they are defined by crystal symmetry.  An approximate (isotropic) 
 treatment of cell esds is used for estimating esds involving l.s. planes. 
; 
 
loop_ 
 _geom_bond_atom_site_label_1 
 _geom_bond_atom_site_label_2 
 _geom_bond_distance 
 _geom_bond_site_symmetry_2 
 _geom_bond_publ_flag 
C1A C6A 1.390(10) . ? 
C1A C2A 1.399(10) . ? 
C1A C20A 1.497(11) . ? 
C2A C3A 1.361(11) . ? 
C3A C4A 1.389(11) . ? 
C4A C5A 1.391(10) . ? 
C5A C6A 1.402(9) . ? 
C5A C23A 1.509(10) . ? 
C6A N1A 1.454(8) . ? 
C7A O1A 1.245(7) . ? 
C7A N1A 1.338(8) . ? 
C7A C8A 1.501(10) . ? 
C8A N2A 1.342(7) . ? 
C8A C9A 1.375(9) . ? 
C9A C10A 1.357(10) . ? 
C10A C11A 1.384(9) . ? 
C11A C12A 1.375(8) . ? 
C12A N2A 1.329(8) . ? 
C12A C13A 1.511(8) . ? 
C13A O2A 1.240(7) . ? 
C13A N3A 1.352(8) . ? 
C14A C19A 1.395(9) . ? 
C14A C15A 1.406(9) . ? 
C14A N3A 1.436(7) . ? 
C15A C16A 1.417(10) . ? 
C15A C26A 1.503(12) . ? 
C16A C17A 1.344(11) . ? 
C17A C18A 1.368(11) . ? 
C18A C19A 1.414(9) . ? 
C19A C29A 1.495(10) . ? 
C20A C22A 1.480(12) . ? 
C20A C21A 1.488(12) . ? 
C23A C25A 1.510(11) . ? 
C23A C24A 1.515(10) . ? 
C26A C28A 1.521(12) . ? 
C26A C27A 1.526(15) . ? 
C29A C31A 1.493(10) . ? 
C29A C30A 1.522(10) . ? 
C1B C2B 1.398(9) . ? 
C1B C6B 1.406(10) . ? 
C1B C20B 1.528(10) . ? 
C2B C3B 1.351(10) . ? 
C3B C4B 1.397(11) . ? 
C4B C5B 1.398(9) . ? 
C5B C6B 1.397(9) . ? 
C5B C23B 1.493(11) . ? 
C6B N1B 1.448(8) . ? 
C7B O2B 1.242(8) . ? 
C7B N1B 1.357(8) . ? 
C7B C8B 1.501(9) . ? 
C8B N2B 1.338(8) . ? 
C8B C9B 1.377(9) . ? 
C9B C10B 1.392(9) . ? 
C10B C11B 1.336(11) . ? 
C11B C12B 1.413(10) . ? 
C12B N2B 1.329(9) . ? 
C12B C13B 1.462(11) . ? 
C13B O1B 1.263(9) . ? 
C13B N3B 1.323(10) . ? 
C14B C19B 1.38(3) . ? 
C14B N3B 1.434(12) . ? 
C14B C15B 1.44(2) . ? 
C15B C16B 1.412(15) . ? 
C15B C26B 1.52(3) . ? 
C16B C17B 1.52(3) . ? 
C17B C18B 1.32(4) . ? 
C18B C19B 1.36(2) . ? 
C19B C29B 1.23(5) . ? 
C20B C22B 1.509(11) . ? 
C20B C21B 1.527(11) . ? 
C23B C25B 1.524(11) . ? 
C23B C24B 1.549(11) . ? 
C26B C27B 1.52(3) . ? 
C26B C28B 1.519(18) . ? 
C29B C30B 1.64(3) . ? 
C29B C31B 1.77(4) . ? 
C32 Cl1 1.61(4) . ? 
C32 Cl2 1.62(4) . ? 
C32 Cl3 1.77(4) . ? 
C33 O7 1.69(6) . ? 
C33 C34 1.74(3) . ? 
C34 C35 1.18(3) . ? 
C35 C36 2.02(4) . ? 
C36 O7 1.98(5) . ? 
N1A Ni1A 1.896(5) . ? 
N2A Ni1A 1.813(5) . ? 
N3A Ni1A 1.893(5) . ? 
N1B Ni1B 1.886(5) . ? 
N2B Ni1B 1.807(5) . ? 
N3B Ni1B 1.903(6) . ? 
Ni1A O3A 1.884(4) . ? 
Ni1B O3B 1.876(4) . ? 
 
loop_ 
 _geom_angle_atom_site_label_1 
 _geom_angle_atom_site_label_2 
 _geom_angle_atom_site_label_3 
 _geom_angle 
 _geom_angle_site_symmetry_1 
 _geom_angle_site_symmetry_3 
 _geom_angle_publ_flag 
C6A C1A C2A 116.9(7) . . ? 
C6A C1A C20A 123.4(7) . . ? 
C2A C1A C20A 119.5(7) . . ? 
C3A C2A C1A 121.3(8) . . ? 
C2A C3A C4A 121.4(7) . . ? 
C3A C4A C5A 119.5(7) . . ? 
C4A C5A C6A 118.2(7) . . ? 
C4A C5A C23A 119.9(7) . . ? 
C6A C5A C23A 122.0(6) . . ? 
C1A C6A C5A 122.7(6) . . ? 
C1A C6A N1A 117.7(6) . . ? 
C5A C6A N1A 119.4(6) . . ? 
O1A C7A N1A 127.8(7) . . ? 
O1A C7A C8A 121.2(6) . . ? 
N1A C7A C8A 110.9(5) . . ? 
N2A C8A C9A 119.5(6) . . ? 
N2A C8A C7A 111.5(5) . . ? 
C9A C8A C7A 128.9(6) . . ? 
C10A C9A C8A 119.0(6) . . ? 
C9A C10A C11A 121.1(6) . . ? 
C12A C11A C10A 117.8(6) . . ? 
N2A C12A C11A 120.4(6) . . ? 
N2A C12A C13A 110.7(5) . . ? 
C11A C12A C13A 128.8(6) . . ? 
O2A C13A N3A 128.4(5) . . ? 
O2A C13A C12A 121.1(5) . . ? 
N3A C13A C12A 110.5(6) . . ? 
C19A C14A C15A 123.1(6) . . ? 
C19A C14A N3A 117.9(6) . . ? 
C15A C14A N3A 118.9(6) . . ? 
C14A C15A C16A 116.7(7) . . ? 
C14A C15A C26A 122.4(6) . . ? 
C16A C15A C26A 120.9(7) . . ? 
C17A C16A C15A 121.0(7) . . ? 
C16A C17A C18A 121.6(7) . . ? 
C17A C18A C19A 121.3(7) . . ? 
C14A C19A C18A 116.3(7) . . ? 
C14A C19A C29A 123.2(6) . . ? 
C18A C19A C29A 120.6(7) . . ? 
C22A C20A C21A 109.9(9) . . ? 
C22A C20A C1A 114.2(7) . . ? 
C21A C20A C1A 115.2(8) . . ? 
C5A C23A C25A 115.6(6) . . ? 
C5A C23A C24A 112.8(7) . . ? 
C25A C23A C24A 109.2(6) . . ? 
C15A C26A C28A 114.4(8) . . ? 
C15A C26A C27A 111.0(8) . . ? 
C28A C26A C27A 109.2(8) . . ? 
C31A C29A C19A 114.4(6) . . ? 
C31A C29A C30A 111.5(6) . . ? 
C19A C29A C30A 110.3(6) . . ? 
C2B C1B C6B 118.4(7) . . ? 
C2B C1B C20B 119.8(7) . . ? 
C6B C1B C20B 121.8(6) . . ? 
C3B C2B C1B 120.2(7) . . ? 
C2B C3B C4B 121.6(7) . . ? 
C3B C4B C5B 120.3(7) . . ? 
C6B C5B C4B 117.5(7) . . ? 
C6B C5B C23B 123.7(6) . . ? 
C4B C5B C23B 118.8(7) . . ? 
C5B C6B C1B 121.9(6) . . ? 
C5B C6B N1B 119.6(6) . . ? 
C1B C6B N1B 118.5(6) . . ? 
O2B C7B N1B 128.4(6) . . ? 
O2B C7B C8B 120.7(6) . . ? 
N1B C7B C8B 110.7(6) . . ? 
N2B C8B C9B 121.0(6) . . ? 
N2B C8B C7B 110.7(5) . . ? 
C9B C8B C7B 128.3(6) . . ? 
C8B C9B C10B 117.5(6) . . ? 
C11B C10B C9B 120.5(7) . . ? 
C10B C11B C12B 120.8(7) . . ? 
N2B C12B C11B 117.4(7) . . ? 
N2B C12B C13B 112.4(6) . . ? 
C11B C12B C13B 130.1(7) . . ? 
O1B C13B N3B 127.5(8) . . ? 
O1B C13B C12B 120.6(7) . . ? 
N3B C13B C12B 111.6(7) . . ? 
C19B C14B N3B 121.1(18) . . ? 
C19B C14B C15B 121.2(14) . . ? 
N3B C14B C15B 117.6(15) . . ? 
C16B C15B C14B 120.5(17) . . ? 
C16B C15B C26B 116.2(18) . . ? 
C14B C15B C26B 123.3(12) . . ? 
C15B C16B C17B 112.4(19) . . ? 
C18B C17B C16B 124.8(15) . . ? 
C17B C18B C19B 120(2) . . ? 
C29B C19B C18B 116(3) . . ? 
C29B C19B C14B 121(2) . . ? 
C18B C19B C14B 121(2) . . ? 
C22B C20B C21B 110.0(7) . . ? 
C22B C20B C1B 110.7(6) . . ? 
C21B C20B C1B 113.5(6) . . ? 
C5B C23B C25B 112.6(7) . . ? 
C5B C23B C24B 111.3(7) . . ? 
C25B C23B C24B 109.0(7) . . ? 
C27B C26B C28B 111.2(19) . . ? 
C27B C26B C15B 111.5(12) . . ? 
C28B C26B C15B 112.7(17) . . ? 
C19B C29B C30B 127(3) . . ? 
C19B C29B C31B 116(2) . . ? 
C30B C29B C31B 96(2) . . ? 
Cl1 C32 Cl2 117(4) . . ? 
Cl1 C32 Cl3 103.0(11) . . ? 
Cl2 C32 Cl3 106.6(13) . . ? 
O7 C33 C34 88(3) . . ? 
C35 C34 C33 108(3) . . ? 
C34 C35 C36 84(3) . . ? 
O7 C36 C35 73(2) . . ? 
C7A N1A C6A 118.2(5) . . ? 
C7A N1A Ni1A 115.8(4) . . ? 
C6A N1A Ni1A 125.8(4) . . ? 
C12A N2A C8A 122.1(5) . . ? 
C12A N2A Ni1A 119.7(4) . . ? 
C8A N2A Ni1A 118.2(5) . . ? 
C13A N3A C14A 117.0(5) . . ? 
C13A N3A Ni1A 116.1(4) . . ? 
C14A N3A Ni1A 126.5(4) . . ? 
C7B N1B C6B 117.5(5) . . ? 
C7B N1B Ni1B 115.8(4) . . ? 
C6B N1B Ni1B 126.6(4) . . ? 
C12B N2B C8B 122.7(6) . . ? 
C12B N2B Ni1B 117.8(5) . . ? 
C8B N2B Ni1B 119.4(4) . . ? 
C13B N3B C14B 118.0(7) . . ? 
C13B N3B Ni1B 115.1(5) . . ? 
C14B N3B Ni1B 127.0(5) . . ? 
N2A Ni1A O3A 177.0(2) . . ? 
N2A Ni1A N3A 83.0(2) . . ? 
O3A Ni1A N3A 98.97(19) . . ? 
N2A Ni1A N1A 83.5(2) . . ? 
O3A Ni1A N1A 94.6(2) . . ? 
N3A Ni1A N1A 166.5(2) . . ? 
N2B Ni1B O3B 178.3(2) . . ? 
N2B Ni1B N1B 83.3(2) . . ? 
O3B Ni1B N1B 98.3(2) . . ? 
N2B Ni1B N3B 82.9(3) . . ? 
O3B Ni1B N3B 95.6(2) . . ? 
N1B Ni1B N3B 166.1(2) . . ? 
C33 O7 C36 104(3) . . ? 
 
loop_ 
 _geom_torsion_atom_site_label_1 
 _geom_torsion_atom_site_label_2 
 _geom_torsion_atom_site_label_3 
 _geom_torsion_atom_site_label_4 
 _geom_torsion 
 _geom_torsion_site_symmetry_1 
 _geom_torsion_site_symmetry_2 
 _geom_torsion_site_symmetry_3 
 _geom_torsion_site_symmetry_4 
 _geom_torsion_publ_flag 
C6A C1A C2A C3A 3.0(10) . . . . ? 
C20A C1A C2A C3A 179.5(7) . . . . ? 
C1A C2A C3A C4A -0.8(11) . . . . ? 
C2A C3A C4A C5A -0.5(10) . . . . ? 
C3A C4A C5A C6A -0.4(9) . . . . ? 
C3A C4A C5A C23A -178.9(6) . . . . ? 
C2A C1A C6A C5A -4.0(9) . . . . ? 
C20A C1A C6A C5A 179.6(6) . . . . ? 
C2A C1A C6A N1A -178.6(5) . . . . ? 
C20A C1A C6A N1A 5.1(9) . . . . ? 
C4A C5A C6A C1A 2.8(9) . . . . ? 
C23A C5A C6A C1A -178.7(6) . . . . ? 
C4A C5A C6A N1A 177.2(5) . . . . ? 
C23A C5A C6A N1A -4.3(9) . . . . ? 
O1A C7A C8A N2A 178.2(6) . . . . ? 
N1A C7A C8A N2A -2.8(8) . . . . ? 
O1A C7A C8A C9A -1.1(11) . . . . ? 
N1A C7A C8A C9A 177.9(7) . . . . ? 
N2A C8A C9A C10A -0.3(10) . . . . ? 
C7A C8A C9A C10A 178.9(7) . . . . ? 
C8A C9A C10A C11A -0.3(11) . . . . ? 
C9A C10A C11A C12A 1.3(10) . . . . ? 
C10A C11A C12A N2A -1.7(9) . . . . ? 
C10A C11A C12A C13A 178.7(6) . . . . ? 
N2A C12A C13A O2A 179.8(6) . . . . ? 
C11A C12A C13A O2A -0.5(10) . . . . ? 
N2A C12A C13A N3A 0.4(7) . . . . ? 
C11A C12A C13A N3A -179.9(6) . . . . ? 
C19A C14A C15A C16A 1.4(10) . . . . ? 
N3A C14A C15A C16A 178.1(6) . . . . ? 
C19A C14A C15A C26A -179.3(7) . . . . ? 
N3A C14A C15A C26A -2.6(10) . . . . ? 
C14A C15A C16A C17A 0.5(11) . . . . ? 
C26A C15A C16A C17A -178.8(8) . . . . ? 
C15A C16A C17A C18A -1.3(12) . . . . ? 
C16A C17A C18A C19A 0.3(12) . . . . ? 
C15A C14A C19A C18A -2.4(10) . . . . ? 
N3A C14A C19A C18A -179.1(6) . . . . ? 
C15A C14A C19A C29A 176.8(6) . . . . ? 
N3A C14A C19A C29A 0.1(9) . . . . ? 
C17A C18A C19A C14A 1.5(10) . . . . ? 
C17A C18A C19A C29A -177.7(6) . . . . ? 
C6A C1A C20A C22A 92.7(10) . . . . ? 
C2A C1A C20A C22A -83.6(10) . . . . ? 
C6A C1A C20A C21A -138.7(8) . . . . ? 
C2A C1A C20A C21A 45.0(11) . . . . ? 
C4A C5A C23A C25A 29.1(9) . . . . ? 
C6A C5A C23A C25A -149.3(6) . . . . ? 
C4A C5A C23A C24A -97.5(8) . . . . ? 
C6A C5A C23A C24A 84.1(8) . . . . ? 
C14A C15A C26A C28A -138.2(8) . . . . ? 
C16A C15A C26A C28A 41.0(12) . . . . ? 
C14A C15A C26A C27A 97.6(10) . . . . ? 
C16A C15A C26A C27A -83.1(10) . . . . ? 
C14A C19A C29A C31A -136.2(7) . . . . ? 
C18A C19A C29A C31A 42.9(9) . . . . ? 
C14A C19A C29A C30A 97.1(7) . . . . ? 
C18A C19A C29A C30A -83.7(8) . . . . ? 
C6B C1B C2B C3B 0.6(10) . . . . ? 
C20B C1B C2B C3B 179.4(7) . . . . ? 
C1B C2B C3B C4B 1.2(11) . . . . ? 
C2B C3B C4B C5B -0.8(11) . . . . ? 
C3B C4B C5B C6B -1.2(10) . . . . ? 
C3B C4B C5B C23B 177.0(7) . . . . ? 
C4B C5B C6B C1B 3.0(10) . . . . ? 
C23B C5B C6B C1B -175.2(6) . . . . ? 
C4B C5B C6B N1B -179.1(6) . . . . ? 
C23B C5B C6B N1B 2.7(10) . . . . ? 
C2B C1B C6B C5B -2.7(10) . . . . ? 
C20B C1B C6B C5B 178.4(6) . . . . ? 
C2B C1B C6B N1B 179.3(6) . . . . ? 
C20B C1B C6B N1B 0.5(9) . . . . ? 
O2B C7B C8B N2B 176.0(6) . . . . ? 
N1B C7B C8B N2B -0.3(8) . . . . ? 
O2B C7B C8B C9B -3.0(11) . . . . ? 
N1B C7B C8B C9B -179.3(7) . . . . ? 
N2B C8B C9B C10B 0.1(11) . . . . ? 
C7B C8B C9B C10B 179.0(7) . . . . ? 
C8B C9B C10B C11B 1.1(12) . . . . ? 
C9B C10B C11B C12B 0.8(15) . . . . ? 
C10B C11B C12B N2B -3.9(16) . . . . ? 
C10B C11B C12B C13B 179.8(11) . . . . ? 
N2B C12B C13B O1B -175.8(11) . . . . ? 
C11B C12B C13B O1B 1(2) . . . . ? 
N2B C12B C13B N3B -1.5(16) . . . . ? 
C11B C12B C13B N3B 174.9(12) . . . . ? 
C19B C14B C15B C16B -4.0(16) . . . . ? 
N3B C14B C15B C16B -178.9(8) . . . . ? 
C19B C14B C15B C26B 176.3(12) . . . . ? 
N3B C14B C15B C26B 1.4(16) . . . . ? 
C14B C15B C16B C17B 0.4(14) . . . . ? 
C26B C15B C16B C17B -179.9(11) . . . . ? 
C15B C16B C17B C18B -1.2(19) . . . . ? 
C16B C17B C18B C19B 6(2) . . . . ? 
C17B C18B C19B C29B -175(2) . . . . ? 
C17B C18B C19B C14B -9(2) . . . . ? 
N3B C14B C19B C29B -11(3) . . . . ? 
C15B C14B C19B C29B 174(2) . . . . ? 
N3B C14B C19B C18B -176.7(11) . . . . ? 
C15B C14B C19B C18B 8.6(19) . . . . ? 
C2B C1B C20B C22B -91.5(8) . . . . ? 
C6B C1B C20B C22B 87.3(8) . . . . ? 
C2B C1B C20B C21B 32.8(10) . . . . ? 
C6B C1B C20B C21B -148.4(7) . . . . ? 
C6B C5B C23B C25B -117.6(8) . . . . ? 
C4B C5B C23B C25B 64.2(9) . . . . ? 
C6B C5B C23B C24B 119.7(8) . . . . ? 
C4B C5B C23B C24B -58.5(9) . . . . ? 
C16B C15B C26B C27B 60.7(16) . . . . ? 
C14B C15B C26B C27B -119.6(15) . . . . ? 
C16B C15B C26B C28B -65.1(17) . . . . ? 
C14B C15B C26B C28B 114.6(13) . . . . ? 
C18B C19B C29B C30B 57(4) . . . . ? 
C14B C19B C29B C30B -110(2) . . . . ? 
C18B C19B C29B C31B -65(3) . . . . ? 
C14B C19B C29B C31B 128.7(16) . . . . ? 
O7 C33 C34 C35 -46(3) . . . . ? 
C33 C34 C35 C36 85(2) . . . . ? 
C34 C35 C36 O7 -77(3) . . . . ? 
O1A C7A N1A C6A -2.5(11) . . . . ? 
C8A C7A N1A C6A 178.5(6) . . . . ? 
O1A C7A N1A Ni1A -178.4(6) . . . . ? 
C8A C7A N1A Ni1A 2.6(7) . . . . ? 
C1A C6A N1A C7A -92.6(7) . . . . ? 
C5A C6A N1A C7A 92.7(7) . . . . ? 
C1A C6A N1A Ni1A 82.8(7) . . . . ? 
C5A C6A N1A Ni1A -91.8(6) . . . . ? 
C11A C12A N2A C8A 1.1(9) . . . . ? 
C13A C12A N2A C8A -179.2(5) . . . . ? 
C11A C12A N2A Ni1A 179.9(5) . . . . ? 
C13A C12A N2A Ni1A -0.4(7) . . . . ? 
C9A C8A N2A C12A -0.1(9) . . . . ? 
C7A C8A N2A C12A -179.5(6) . . . . ? 
C9A C8A N2A Ni1A -178.9(5) . . . . ? 
C7A C8A N2A Ni1A 1.8(7) . . . . ? 
O2A C13A N3A C14A -6.3(10) . . . . ? 
C12A C13A N3A C14A 173.1(5) . . . . ? 
O2A C13A N3A Ni1A -179.6(5) . . . . ? 
C12A C13A N3A Ni1A -0.2(6) . . . . ? 
C19A C14A N3A C13A -88.3(7) . . . . ? 
C15A C14A N3A C13A 94.9(7) . . . . ? 
C19A C14A N3A Ni1A 84.3(7) . . . . ? 
C15A C14A N3A Ni1A -92.6(7) . . . . ? 
O2B C7B N1B C6B -1.1(10) . . . . ? 
C8B C7B N1B C6B 174.8(6) . . . . ? 
O2B C7B N1B Ni1B -177.3(6) . . . . ? 
C8B C7B N1B Ni1B -1.3(7) . . . . ? 
C5B C6B N1B C7B 72.7(8) . . . . ? 
C1B C6B N1B C7B -109.3(7) . . . . ? 
C5B C6B N1B Ni1B -111.6(6) . . . . ? 
C1B C6B N1B Ni1B 66.4(8) . . . . ? 
C11B C12B N2B C8B 5.2(14) . . . . ? 
C13B C12B N2B C8B -177.8(9) . . . . ? 
C11B C12B N2B Ni1B -179.1(8) . . . . ? 
C13B C12B N2B Ni1B -2.2(12) . . . . ? 
C9B C8B N2B C12B -3.4(12) . . . . ? 
C7B C8B N2B C12B 177.5(8) . . . . ? 
C9B C8B N2B Ni1B -179.0(5) . . . . ? 
C7B C8B N2B Ni1B 1.9(8) . . . . ? 
O1B C13B N3B C14B -3(2) . . . . ? 
C12B C13B N3B C14B -177.2(14) . . . . ? 
O1B C13B N3B Ni1B 178.1(12) . . . . ? 
C12B C13B N3B Ni1B 4.3(15) . . . . ? 
C19B C14B N3B C13B -85.9(15) . . . . ? 
C15B C14B N3B C13B 88.9(14) . . . . ? 
C19B C14B N3B Ni1B 92.3(13) . . . . ? 
C15B C14B N3B Ni1B -92.8(12) . . . . ? 
C12A N2A Ni1A O3A 130(4) . . . . ? 
C8A N2A Ni1A O3A -51(4) . . . . ? 
C12A N2A Ni1A N3A 0.2(5) . . . . ? 
C8A N2A Ni1A N3A 179.0(5) . . . . ? 
C12A N2A Ni1A N1A -179.1(5) . . . . ? 
C8A N2A Ni1A N1A -0.3(5) . . . . ? 
C13A N3A Ni1A N2A 0.0(4) . . . . ? 
C14A N3A Ni1A N2A -172.6(6) . . . . ? 
C13A N3A Ni1A O3A -177.6(4) . . . . ? 
C14A N3A Ni1A O3A 9.8(6) . . . . ? 
C13A N3A Ni1A N1A 2.9(12) . . . . ? 
C14A N3A Ni1A N1A -169.7(9) . . . . ? 
C7A N1A Ni1A N2A -1.5(5) . . . . ? 
C6A N1A Ni1A N2A -177.0(5) . . . . ? 
C7A N1A Ni1A O3A 176.2(5) . . . . ? 
C6A N1A Ni1A O3A 0.7(5) . . . . ? 
C7A N1A Ni1A N3A -4.3(13) . . . . ? 
C6A N1A Ni1A N3A -179.8(8) . . . . ? 
C12B N2B Ni1B O3B -24(10) . . . . ? 
C8B N2B Ni1B O3B 151(10) . . . . ? 
C12B N2B Ni1B N1B -178.0(7) . . . . ? 
C8B N2B Ni1B N1B -2.2(6) . . . . ? 
C12B N2B Ni1B N3B 3.6(8) . . . . ? 
C8B N2B Ni1B N3B 179.4(7) . . . . ? 
C7B N1B Ni1B N2B 1.9(5) . . . . ? 
C6B N1B Ni1B N2B -173.8(6) . . . . ? 
C7B N1B Ni1B O3B -177.3(5) . . . . ? 
C6B N1B Ni1B O3B 6.9(6) . . . . ? 
C7B N1B Ni1B N3B 8.5(18) . . . . ? 
C6B N1B Ni1B N3B -167.3(15) . . . . ? 
C13B N3B Ni1B N2B -4.5(10) . . . . ? 
C14B N3B Ni1B N2B 177.2(14) . . . . ? 
C13B N3B Ni1B O3B 174.7(10) . . . . ? 
C14B N3B Ni1B O3B -3.6(14) . . . . ? 
C13B N3B Ni1B N1B -11(2) . . . . ? 
C14B N3B Ni1B N1B 170.7(15) . . . . ? 
C34 C33 O7 C36 -21(3) . . . . ? 
C35 C36 O7 C33 51(3) . . . . ? 
 
_diffrn_measured_fraction_theta_max    0.899 
_diffrn_reflns_theta_full              23.59 
_diffrn_measured_fraction_theta_full   0.899 
_refine_diff_density_max    0.909 
_refine_diff_density_min   -1.005 
_refine_diff_density_rms    0.109 
